# Supplementary material
Source: PubMed Central journal article supplement (PMC4348467)

**Figure S3:** Treating NM cell line, WM 1366 with BI-D1870 induces a dose-dependent reduction in cell proliferation.

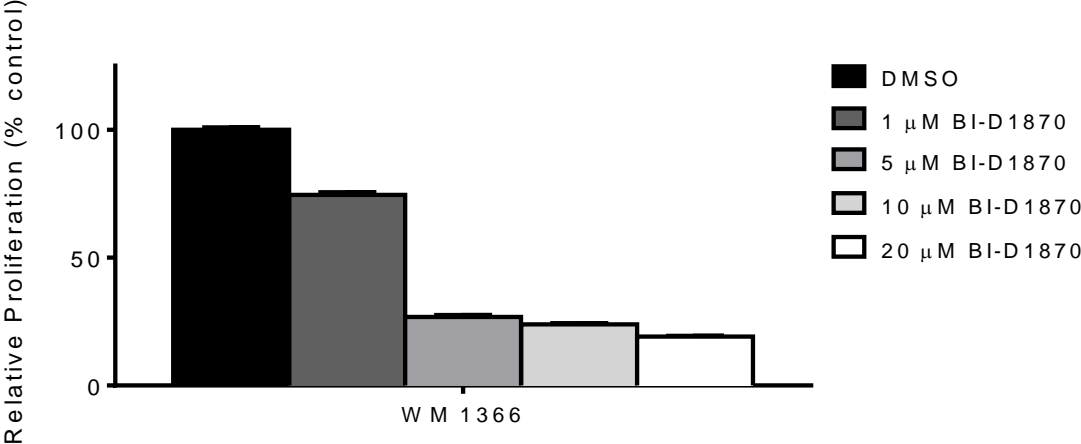

Supplement: mmc3.pdf [file mmc3.pdf]
