# Supplementary material
Source: PubMed Central journal article supplement (PMC4348467)

**Figure S1:** Relative intensity of p-ERK and p-RSK1 expression in VGP cell lines.

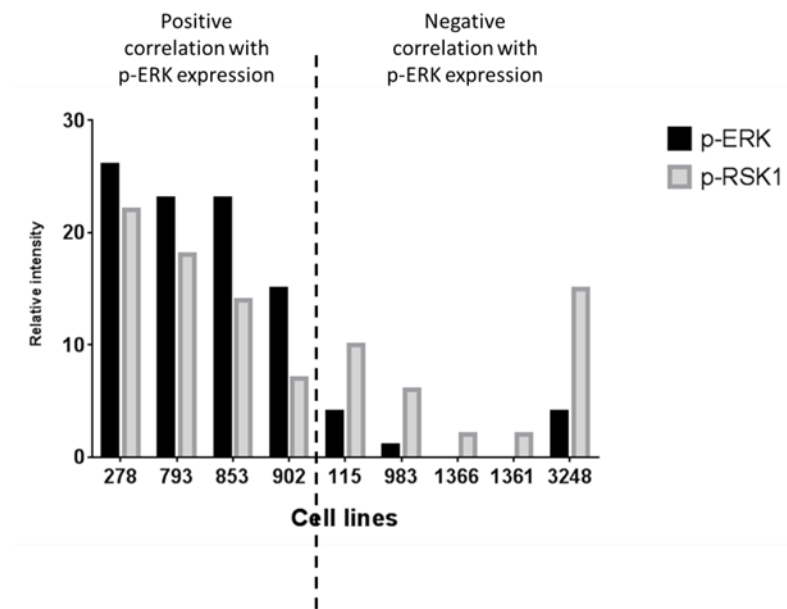

Supplement: mmc1.pdf [file mmc1.pdf]

**Figure S2:** Test of two siRNA candidates targeting RSK1

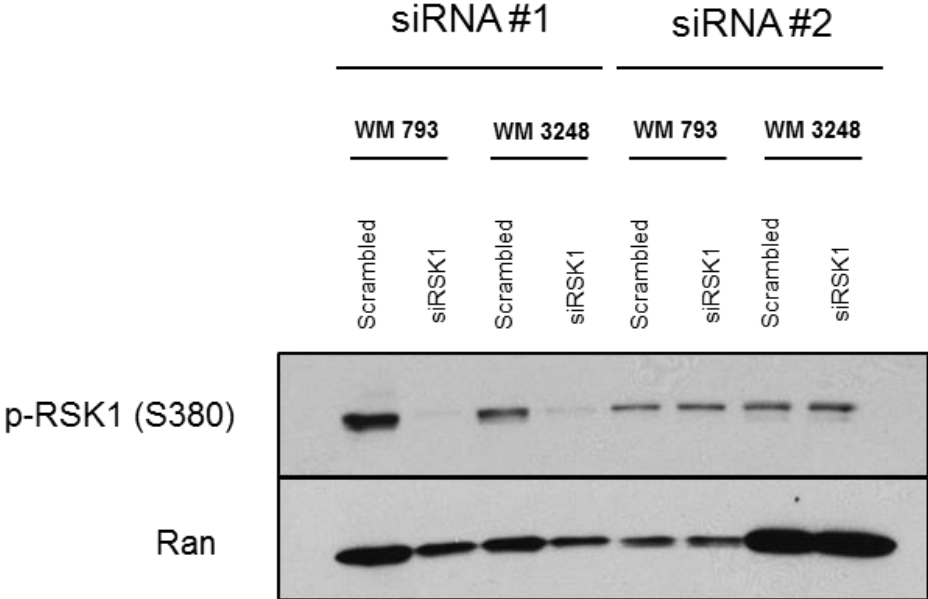

Supplement: mmc2.pdf [file mmc2.pdf]
